# Supplementary material for: Comparing the effect of peritoneal dialysis cycler type on patient-reported satisfaction, support needs and treatments
Source: BMC Nephrol. 2022 Jun 21;23:217. doi: 10.1186/s12882-022-02854-z (PMC9209826; doi:10.1186/s12882-022-02854-z)
Supplement: Supplementary file 2 — Additional file 2. Amia vs HomeChoice Prospective Data. [file 12882_2022_2854_MOESM2_ESM.xlsx]

## Sheet: Raw Data
Dialysis Modality	Age at PD initiation	Race	Ethnicity	Months since PD initiation	Number of days of training	Sept-19	Oct-19	Nov-19	2019-12-19	2020-01-20	2020-02-20	Average Kt/V	Number Kt/V's Collected	Number of months in the study	Sept-19	Oct-19	Nov-19	2019-12-19	2020-01-20	2020-02-20	Total No. of Telephone Encounters	Total No. of Office Encounters	PD-related Encounters	Non-PD related Encounters	Number of Hospitalizations	PD-related Hospitalization	Non-PD related Hospitalization
Amia	47	AA	Hispanic	72	Re-trained			2.09			2.01	2.05	2	6				1- ED: Fall and RLE weakness 1- ED: LUE pain			0	0	0	0	2	0	2
Amia	49	AA	Hispanic	49	Re-trained		2.33				2.21	2.27	2	6		1- Amia machine not turning on 1- Office: Abdominal pain		1- ED: Peritonitis, HyperK	1- ED: HTN	1- Constipation 1- Office: Fibrin clots and cloudy PD fluid 1- Office: Abdominal pain, r/o peritonitis	2	3	4	1	2	1 - Peritonitis	1
Amia	62	White	Hispanic	4	3		2.59			2.17		2.38	2	6		1- Abdominal rash					1	0	0	1	0	0	0
Amia	53	AA	Hispanic	9	3			1.16	1.92			1.54	2	6				2- Office: Abx for peritonitis	1- ED: PNA		0	2	2	0	1	0	1
Amia	37	AA	Hispanic	50	Re-trained		2.54			2.77		2.655	2	6						1- Office: Exit site infx 1- Office: Bloody effluent	0	2	2	0	0	0	0
Amia	56	Asian	Hispanic	12	4		2.03			1.51		1.77	2	6						1- Headache, weakness	1	0	0	1	0	0	0
Amia	30	Other	Hispanic	11	5	1.5	1.67			1.47	1.26	1.475	4	6			1- Blood in stool 1- ED: Anemia, Hypotension			1- Office: Transfer set contamination	1	1	1	1	1	0	1
Amia	55	AA	Hispanic	25	6	1.63			2.54			2.085	2	6							0	0	0	0	0	0	0
Amia	67	AA	Hispanic	4	7			1.45	1.46	2.04		1.65	3	6			1- Office: Transition temporarily to HD	1- Office: Blurry vision 1- ED: Diarrhea and C diff	1- ED: RSV, hypotension	1- ED: Hypotension 1- "Expected UF" deviation	1	2	2	1	3	0	3
Amia	50	Other	Non-Hispanic	9	4		2.38			3.02		2.7	2	6							0	0	0	0	0	0	0
Amia	75	Asian	Non-Hispanic	29	6	1.82			1.9			1.86	2	6		1- Amia machine broken	1- Weakness, Anemia		1- Amia not working		3	0	3	0	0	0	0
Amia	65	Asian	Non-Hispanic	28	6						1.62	1.62	1	6							0	0	0	0	0	0	0
Amia	77	Other	Non-Hispanic	41	3			1.54	1.72			1.63	2	6			1- ED: Epistaxis			1- Requesting CBC to be sent to Hem-Onc 1- Follow up post discharge from ED 1- Office: Anemia 1- ED: Transfusion	2	1	0	3	2	0	2
Amia	79	Other	Non-Hispanic	9	4		3.28				1.9	2.59	2	6		1- Ran out of Extraneal		1- ED: Peritonitis	1- ED: Peritonitis	1- ED: Peritonitis	1	0	1	0	3	3 - Peritonitis	0
Amia	32	AA	Non-Hispanic	118	Re-trained		1.77					1.77	2	6							0	0	0	0	0	0	0
Amia	33	AA	Non-Hispanic	8	4				2.69			2.69	1	6	1- Office: Exit site irritation (catheter replaced) 1- Office: New transfer set connection	1- Exit site tenderness	1- Office: Exit site irritation			1- Office: Vancomycin for exit site infection	1	4	5	0	0	0	0
Amia	49	Other	Non-Hispanic	4	5		1.83			2.08		1.955	2	6							0	0	0	0	0	0	0
Amia	67	White	Non-Hispanic	63	8			1.61	1.8			1.705	2	6							0	0	0	0	0	0	0
Amia	31	Asian	Non-Hispanic	1	3		3.59		3.27			3.43	2	6		1- Office: URI	2- Office: Exit site infection				0	3	2	1
Amia	59	Other	Non-Hispanic	11	4			1.75			0.95	1.35	2	6			1- ED: SOB	2 - ED: LLQ pain, diarrhea	1- ED: Chest pain 1- ED: Unclear	1- Office: SOB, fatigue 1- Manual drain	1	1	1	1
Amia	54	AA	Non-Hispanic	21	7		1.87			1.67		1.77	2	6				1 - HTN	1 - Anemia	1 - Travel	3	0	0	3	2	0	2
Amia	54	Other	Non-Hispanic	18	Re-trained			2.26			2.11	2.185	2	6		1 - Office: Influenza	1 - Office: CBC				0	2	0	2	0	0	0
Amia	52	AA	Non-Hispanic	37	4		2.21			2.28		2.245	2	6							0	0	0	0	0	0	0
Amia	53	Other	Non-Hispanic	17	4		2.09			2.48		2.285	2	6		1 - Anemia					1	0	0	1	0	0	0
Amia	48	AA	Non-Hispanic	11	5				1.61	1.77		1.69	2	6			1 - Anemia			1 - Office: Exit site	1	1	1	1	0	0	0
Amia	58	Other	Non-Hispanic	11	5			1.75				1.75	1	6						1 - Office: Draining issues	1	0	1	0	6	1 - SOB, HTN	5
Amia	48	AA	Non-Hispanic	6	Re-trained			1.79	1.67			1.73	2	6		1 - Cloudy fluid	2 - Abdominal Pain 1 - Office: Abdominal pain				3	1	1	3	1	1 - Peritonitis	0
Amia	40	White	Non-Hispanic	8	8		1.75			1.62	1.89	1.75333	3	6	1 - Anemia	1 - Too much UF					2	0	1	1	2	0	2
Amia	78	White	Non-Hispanic	2	4	1.37		1.66			1.7	1.58	3	6	1 - Back pain from LBO	1 - Programming for Extraneal	1 - Amia programming (initial drain bypass)	1 - Office: Tube change			3	1	4	0	1	0	1
Amia	69	White	Non-Hispanic	13	Re-trained	2.36				2.06		2.21	2	4	1 - Hypotension						1	0	1	0	8	0	8
Amia	22	AA	Non-Hispanic	13	Re-trained		2.07					2.07	1	4		1 - Volume overload	1 - Office: Tunnel infection		1 - Office: Pain at new PD catheter		1	2	3	0	3	1 - Uremia	2
Amia	55	AA	Non-Hispanic	32	Re-trained		2.65			2.22		2.435	2	6			3 - Office: Peritonitis				3	0	3	0	0	0	0
HC	41	Asian	Non-Hispanic	47	6		2.73			2.15		2.44	2	4							0	0	0	0	0	0	0
HC	71	Other	Hispanic	38	7		1.66				1.68	1.67	2	6				1 - Office: Exite site infection			0	1	1	0	3	1 - Peritonitis	2
HC	50	Other	Hispanic	69	7		1.7				1.99	1.845	2	6		1 - Anemia				1 - Reprogram Amia cycler	2	0	1	1	0	0	0
HC	57	White	Non-Hispanic	51	Re-trained			1.9			1.76	1.83	2	6							0	0	0	0	0	0	0
HC	55	Other	Hispanic	65	7	1.98		1.84			1.85	1.89	3	6							0	0	0	0	0	0	0
HC	52	Other	Hispanic	120	Unable to determine		2.47					2.47	1	6				2 - Office: Back pain			0	2	0	2	5	0	5

## Sheet: Survey Results
Amia							HC
	Comfort	Troubleshoot/Change	Satisfied	Help				Comfort	Troubleshoot/Change	Satisfied	Help
	5	5	5	1				4	3	4	2
	5	4	4	2				4	4	5	1
	5	5	5	1				5	3	5	2
	5	5	5	1				4	4	4	1
	5	5	5	1				5	3	5	1
	5	5	5	2				5	4	4	2
	5	5	5	1			Mean	4.5	3.5	4.5	1.5
	5	4	5	1
	5	5	5	1
	5	5	5	1
	5	5	5	2
	5	5	5	1
	5	5	5	1
	5	5	5	1
	5	5	4	1
	5	5	5	1
	5	5	5	2
	4	4	4	1
	4	4	4	1
	5	5	5	1
	5	5	5	1
	5	5	5	1
	5	4	5	1
	5	5	5	1
	5	5	5	1
	5	5	5	1
	5	4	4	1
	4	5	4	2
	5	5	5	2
	5	5	4	1
	4	5	5	2
	5	5	5	1
Mean	4.875	4.8125	4.78125	1.21875
AMIA Prevalent							Incident AMIA
	Comfort	Troubleshoot/Change	Satisfied	Help				Comfort	Troubleshoot/Change	Satisfied	Help
	5	5	5	1				5	5	5	1
	5	4	4	2				5	5	5	1
	5	5	5	1				5	5	5	2
	5	5	5	1				4	4	4	1
	5	5	5	2				5	4	4	1
	5	5	5	1			Mean	4.8	4.6	4.6	1.2
	5	4	5	1
	5	5	5	1
	5	5	5	2
	5	5	5	1
	5	5	5	1
	5	5	5	1
	5	5	4	1
	5	5	5	1
	4	4	4	1
	5	5	5	1
	5	5	5	1
	5	5	5	1
	5	4	5	1
	5	5	5	1
	5	5	5	1
	5	5	5	1
	4	5	4	2
	5	5	5	2
	5	5	4	1
	4	5	5	2
	5	5	5	1
Mean	4.88889	4.85185	4.81481	1.22222
