# Supplementary material for: Comparing the effect of peritoneal dialysis cycler type on patient-reported satisfaction, support needs and treatments
Source: BMC Nephrol. 2022 Jun 21;23:217. doi: 10.1186/s12882-022-02854-z (PMC9209826; doi:10.1186/s12882-022-02854-z)
Supplement: Supplementary file 3 — Additional file 3. Amia vs HomeChoice Retrospective Data. [file 12882_2022_2854_MOESM3_ESM.xlsx]

## Sheet: Raw Data
Age at PD initiation	Race	Ethnicity	Dialysis Modality	Months since PD initiation	Number of days of training	2017-08-01	2017-09-01	2017-10-01	2017-11-01	2017-12-01	2018-01-01	Number Kt/V's Collected	Average Kt/V	Number of months in the study	2017-08-01	2017-09-01	2017-10-01	2017-11-01	2017-12-01	2018-01-01	Total No. of Telephone Encounters	Total No. of Office Encounters	PD-related Encounters	Non-PD related Encounters	Number of Hospitalizations	PD-related Hospitalization	Non-PD related Hospitalization
71	Other	Hispanic	Amia	0	8		2.02	1.95			2.11	3	2.03	3	0	0	1 - Constipation	0	0	0	0	1	0	1	1 - PD catheter placement, PD initiation	1	0
55	AA	Non-Hispanic	Amia	0	6		1.71	1.76		1.94		3	1.8	5	0	0	0	0	0	2 - URI	0	2	0	2	0	0	0
56	AA	Non-Hispanic	Amia	0	3				0.92		1.41	2	1.17	3	0	0	0	3 - Peritonitis	0	0	0	3	3	0	0	0	0
59	AA	Non-Hispanic	Amia	0	5	4.71			4.2		4.13	3	4.35	5	0	1 - Exit Site tenderness	0	0	0	0	0	1	1	0	0	0	0
43	Asian	Non-Hispanic	Amia	1	5	2.06			2.47			2	2.27	6	0	1 - ED, Hypotension	0	0	0	0	0	1	0	1	0	0	0
50	AA	Non-Hispanic	Amia	1	11		1.73					1	1.73	6	0	0	0	0	1 - Vancomyinc post-colonoscopy	0	0	1	0	1	0	0	0
78	White	Non-Hispanic	Amia	1	9		2.03		2.16			2	2.1	4	0	1 - Telephone (cycler not draining)	0	0	0	0	1	0	1	0	0	0	0
65	Other	Hispanic	Amia	3	7	2.15			1.51			2	1.83	6	1 - Diarrhea 2 - Telephone (Diarrhea, Hypotension)	1 - Hazy effluent, fibrin	0	0	2 - Blood-tinged effluent. Vancomycin post-colonoscopy	0	2	4	2	4	1 - Diarrhea	0	1
36	Asian	Non-Hispanic	Amia	3	7	3.78		4.6			4.25	3	4.21	6	0	0	0	1 - Telephone (low grade fever)	0	0	1	0	0	1	0	0	0
47	White	Non-Hispanic	Amia	3	4	2.17		2.01			2.07	3	2.08	6	0	1 - LE edema	0	0	0	0	0	1	1	0	0	0	0
75	Asian	Non-Hispanic	Amia	4	6	2.34			2.41			2	2.38	6	0	0	0	0	0	0	0	0	0	0	0	0	0
66	AA	Non-Hispanic	Amia	5	7			2.45			1.97	2	2.21	6	0	0	0	0	0	0	0	0	0	0	0	0	0
34	AA	Non-Hispanic	Amia	6	8	1.95		2.22				2	2.09	6	0	1 - Exit Site tenderness	0	0	0	0	0	1	1	0	0	0	0
81	Asian	Non-Hispanic	Amia	6	3	1.71						1	1.71	3	0	0	0	0	0	0	0	0	0	0	0	0	0
56	AA	Non-Hispanic	Amia	9	4			1.67				1	1.67	6	0	0	0	0	0	1 - Admission (chest pain)	0	0	0	0	0	0	0
71	Asian	Non-Hispanic	Amia	9	8	1.92			2.06			2	1.99	6	1 - Cough	0	0	0	0	0	0	1	0	1	1 - Hypervolemia	1	0
45	Asian	Non-Hispanic	Amia	10	7	2.45		2.02			2.11	3	2.19	6	0	0	0	0	0	0	0	0	0	0	0	0	0
52	AA	Non-Hispanic	Amia	12	4				2.98		2.28	2	2.63	6	0	0	0	0	0	0	0	0	0	0	0	0	0
67	AA	Non-Hispanic	Amia	12	8							0		5	0	0	0	3 - Peritonitis	0	0	0	3	3	0	0	0	0
40	AA	Non-Hispanic	Amia	14	3		1.74	1.98	1.86			3	1.86	6	3 - Peritonitis	1 - SOB/Peritnoitis	1 - Telephone (Broken Cycler)	0	0	0	1	4	5	0	0	0	0
80	White	Non-Hispanic	Amia	15	16			1.82			1.41	2	1.62	6	1 - Telephone (Cassette failure)	0	0	0	1 - Cycler not draining	0	0	2	2	0	0	0	0
49	White	Non-Hispanic	Amia	15	4			1.44		1.29	1.68	3	1.47	6	0	0	0	1 - Peritonitis	0	1 - Peritonitis	0	2	2	0	2 - Peritonitis, liver abscess, bacteremia	2	0
77	Other	Hispanic	Amia	16	3	2.26		1.89			2.42	3	2.19	6	0	0	0	0	0	0	0	0	0	0	1 - Anemia	0	0
57	AA	Non-Hispanic	Amia	16	11	1.72			1.74			2	1.73	6	0	0	0	0	1 - Vancomyinc post-colonoscopy	0	0	1	0	1	0	0	0
70	AA	Non-Hispanic	Amia	16	7			1.85			1.72	2	1.79	6	0	0	0	0	0	0	0	0	0	0	0	0	0
73	Other	Hispanic	Amia	16	5	1.61			1.55			2	1.58	6	0	0	0	0	0	1 - Telephone (Low BP)	1	0	1	0	1 - Headache, dizziness, and vomitting	0	1
61	AA	Non-Hispanic	Amia	16	Re-trained			1.43			1.78	2	1.61	6	1 - Hypertension	0	0	0	0	0	0	1	1	0	1 - Syncope	0	1
61	Other	Hispanic	Amia	17	4			2			1.58	2	1.79	6	0	0	0	0	0	0	0	0	0	0	0	0	0
70	White	Non-Hispanic	Amia	19	4	2		2.03			1.53	3	1.85	6	0	0	0	0	0	0	0	0	0	0	0	0	0
55	AA	Non-Hispanic	Amia	19	Re-trained		1.38	1.84			1.86	3	1.67	6	0	0	0	0	0	0	0	0	0	0	0	0	0
63	AA	Non-Hispanic	Amia	21	Re-trained			1.85	1.9			2	1.88	6	0	0	0	0	0	0	0	0	0	0	1 - Hypoxia	0	1
78	Other	Non-Hispanic	Amia	22	Re-trained		1.64	1.66			1.94	3	1.75	6	0	0	0	1 - Vancomycin post-colonoscopy	0	0	0	1	0	1	0	0	0
63	White	Non-Hispanic	Amia	23	Re-trained	1.8	1.79		1.88	1.9		4	1.84	6	0	0	0	0	0	0	0	0	0	0	0	0	0
49	AA	Non-Hispanic	Amia	24	Re-trained	1.44	1.71	1.87			1.6	4	1.66	6	0	0	0	0	0	0	0	0	0	0	0	0	0
80	AA	Non-Hispanic	Amia	24	Re-trained				1.56			1	1.56	6	0	0	1 - Telephone (shingles)	0	0	0	1	0	0	1	1 - LOC, vomiting 2 - Left hip arthritis 3 - Parathyroidectomy 4 - PD cycler malfunction (uremia)	1	3
37	AA	Non-Hispanic	Amia	25	Re-trained	2.33				2.32		2	2.33	6	0	0	0	1 - Abdominal pain post-hernia repair 1 - Telephone (Abdominal pain)	0	0	1	1	1	0	1 - Chest Pain	0	1
53	Other	Hispanic	Amia	25	Re-trained			1.84			1.61	2	1.73	6	0	0	0	0	0	0	0	0	0	0	0	0	0
43	Other	Hispanic	Amia	35	Re-trained	1.72			1.65		1.49	3	1.62	6	0	0	0	0	0	0	0	0	0	0	0	0	0
67	White	Non-Hispanic	Amia	38	Re-trained			1.8			1.74	2	1.77	6	0	0	0	0	0	0	0	0	0	0	0	0	0
78	White	Non-Hispanic	Amia	41	Re-trained		2.01	1.82			2.11	3	1.98	6	1 - Telephone (Lost dwell time)	1 - Telephone (Abdominal pain)	0	1 - Telephone (Abdominal pain)	0	0	3	0	3	2	0	0	0
47	AA	Non-Hispanic	Amia	47	Re-trained	1.1	1.67		1.38		1.88	4	1.51	6	2 - Exit site Leak	1 - Telephone (L abdoominal pressure, LE swelling) 1 - L abd pain	0	0	0	0	1	3	4	0	0	0	0
30	AA	Non-Hispanic	Amia	55	Re-trained		1.68					1	1.68	6	0	0	2 - Slow flow alarm, Fibrin blockage	0	1 - Abdominal Pain	0	0	3	3	0	1 - Enteritis	0	1
32	AA	Non-Hispanic	Amia	93	Re-trained		1.38		1.78		1.85	3	1.67	6	0	1 - Catheter leak	0	0	0	0	0	1	1	0	0	0	0
81	White	Non-Hispanic	HC	0	4				2.74			1	2.74	3	0	0	0	0	0	0	0	0	0	0	0	0	0
60	White	Non-Hispanic	HC	12	Unknown		2.07	2.11			1.45	3	1.78	6	0	0	0	1- Telephone (shingles)	0	0	1	0	0	1	0	0	0
71	Other	Hispanic	HC	13	7			1.55			1.74	2	1.65	6	0	0	0	0	0	0	0	0	0	0	0	0	0
57	Other	Hispanic	HC	13	5			3.23			2.88	2	3.06	6	0	0	0	0	0	0	0	0	0	0	0	0	0
75	White	Non-Hispanic	HC	14	11		1.71					1	1.71	3	0	0	0	0	0	0	0	0	0	0	0	0	0
41	Asian	Non-Hispanic	HC	22	6		2.4			2.79		2	2.6	6	0	0	0	0	0	0	0	0	0	0	0	0	0
57	White	Non-Hispanic	HC	26	Re-trained		1.41	1.92				2	1.67	6	0	1 - Telephone (Broke home cycler)	0	0	0	0	0	1	1	0	1 - Femoral neck fracture	0	1
44	White	Non-Hispanic	HC	31	Re-trained					1.54		1	1.54	6	1 - Chest pain	0	0	0	0	0	0	1	0	1	1 - Chest Pain	0	1
55	AA	Non-Hispanic	HC	31	7	2.93						1	2.93	6	0	0	0	0	0	0	0	0	0	0	1 - NSTEMI, peritonitis 1 - Pneumonia	1	1
55	AA	Non-Hispanic	HC	32	Re-trained		1.28	1.59				2	1.44	4	0	0	0	0	0	0	0	0	0	0	0	0	0
41	AA	Non-Hispanic	HC	32	7		2.11		1.6	1.52		3	1.74	6	0	1 - Telephone (Low back pain)	0	3 - Telephone (Headache, Cough, ran out of Extraneal bags)	0	0	4	0	1	3	1 - SOB, palpitations	0	1
61	White	Non-Hispanic	HC	36	10	1.81			1.9			2	1.86	6	1 - Telephone (Problem with cycler)	0	1 - Right ankle pain	0	0	0	1	1	1	1	0	0	0
53	Other	Hispanic	HC	40	7		1.86		1.95		1.79	3	1.87	6	0	0	0	0	0	0	0	0	0	0	0	0	0
91	White	Non-Hispanic	HC	41	Unknown		1.2	1.29				2	1.25	3	0	0	0	0	0	0	0	0	0	0	0	0	0
50	Other	Hispanic	HC	44	7	2.01		1.94			1.91	3	1.95	6	0	0	0	0	0	0	0	0	0	0	0	0	0
52	AA	Non-Hispanic	HC	53	5		1.97		2.16			2	2.07	6	0	0	0	2 - Peritonitis	1 - Peritonitis	0	0	3	3	0	0	0	0
53	Other	Hispanic	HC	54	3		0.97					1	0.97	6	0	0	0	0	0	0	0	0	0	0	0	0	0
25	AA	Non-Hispanic	HC	56	4		0.83	1.61				2	0.81	5	0	0	0	0	0	0	0	0	0	0	0	0	0
81	Other	Hispanic	HC	59	8	2.01			2.13			2	2.07	6	0	0	0	0	0	0	0	0	0	0	0	0	0
30	AA	Non-Hispanic	HC	61	5				2.03			1	2.03	6	0	0	0	0	0	0	0	0	0	0	0	0	0
25	Asian	Non-Hispanic	HC	74	Unknown		2.26			1.7		2	1.98	5	1 - Telephone (swollen abdomen)	0	0	0	0	0	1	0	0	1	1 - Chest Pain, Hypertensive Emergency	1	0
40	AA	Non-Hispanic	HC	82	Unknown		2.32		2.13		2.05	3	2.17	6	0	1 - LBO issue 2 - Telephone issue draining	0	0	0	0	1	1	2	0	0	0	0
40	Other	Hispanic	HC	91	Unknown		1.95					1	1.95	4	0	0	0	Expired			0	0	0	0	0	0	0
52	Other	Hispanic	HC	95	Unknown		1.81	1.85				2	1.83	6	0	0	0	0	0	0	0	0	0	0	0	0	0
57	White	Non-Hispanic	HC	114	Re-trained		2.78					1	2.78	6	0	1 - Telephone (low flows) 1 - No Rx due to poor flow	1 - Telephone (system error)	0	0	0	2	1	3	0	0	0	0
36	AA	Non-Hispanic	HC	200	Unknown		2.16		2.17			2	2.17	6	0	0	0	0	0	0	0	0	0	0	1 - Renal Mass	0	1
61	AA	Non-Hispanic	HC	Uknown	Uknown				1.64			1	1.64	5	3 - Tunnel site abscess	0	2 - Peritonitis	2 - Peritonitis 1 - Telephone (cycler reprogramming)	0	0	1	7	8	0	2 - Peritonitis	2	0
